# Supplementary material for: Fruit and Vegetable Intake and Home Nutrition Environment among Low-Income Minority Households with Elementary-Aged Children
Source: MDPI journal article supplement (doi:10.3390/nu15081819), 2023-04-10
Supplement: s1 [file s1]

**Supplemental Table S1: Association Between SNAP participation and Child FV Intake at each Level of Parent FV Intake Frequency Among Hispanic/Latinos (Interaction Effect Between SNAP Participation and Parent FV Intake in relation to Child FV Intake)**

| Adjusted Mean Difference in<br>Child FV Intake between SNAP<br>vs. no-SNAP |                        |                     |
|----------------------------------------------------------------------------|------------------------|---------------------|
| Parent FV Intake                                                           | $\beta^a$ (95% CI)     | P value*            |
| 0 times/day (n = 11)                                                       | -0.046 (-0.160, 0.068) | 0.430               |
| 0.214 times/day (n = 49)                                                   | -0.031 (-0.133, 0.070) | 0.545               |
| 0.429 times/day (n = 499)                                                  | -0.017 (-0.107, 0.073) | 0.712               |
| 0.5 times/day (n = 33)                                                     | -0.002 (-0.081, 0.076) | 0.951               |
| 0.714 times/day (n = 607)                                                  | 0.012 (-0.056, 0.080)  | 0.728               |
| 0.786 times/day (n = 20)                                                   | 0.026 (-0.032, 0.085)  | 0.373               |
| 1 times/day (n = 1,091)                                                    | 0.041 (-0.010, 0.091)  | 0.113               |
| 1.214 times/day (n = 91)                                                   | 0.055 (0.010, 0.101)   | <b>*0.018</b>       |
| 1.286 times/day (n = 733)                                                  | 0.070 (0.025, 0.115)   | <b>**0.002</b>      |
| 1.5 times/day (n = 309)                                                    | 0.084 (0.036, 0.132)   | <b>**0.001</b>      |
| 1.571 times/day (n = 660)                                                  | 0.099 (0.045, 0.153)   | <b>***&lt;0.001</b> |
| 1.786 times/day (n = 538)                                                  | 0.113 (0.051, 0.176)   | <b>***&lt;0.001</b> |
| 2 times/day (n = 911)                                                      | 0.128 (0.055, 2.002)   | <b>***&lt;0.001</b> |

Abbreviations: FV, fruit and vegetable; CI, confidence interval.

\*Boldface indicates statistical significance at \*P<0.05, \*\*P<0.01, \*\*\*P<0.001

<sup>a</sup>Adjusted for SNAP, Medicare, parent age, language spoken at home, child age, city, and food insecurity status.

**Figure S1. Contrasts of Predictive Margins: SNAP by Hispanic/Latino Parent FV Intake with 95% Confidence Intervals**

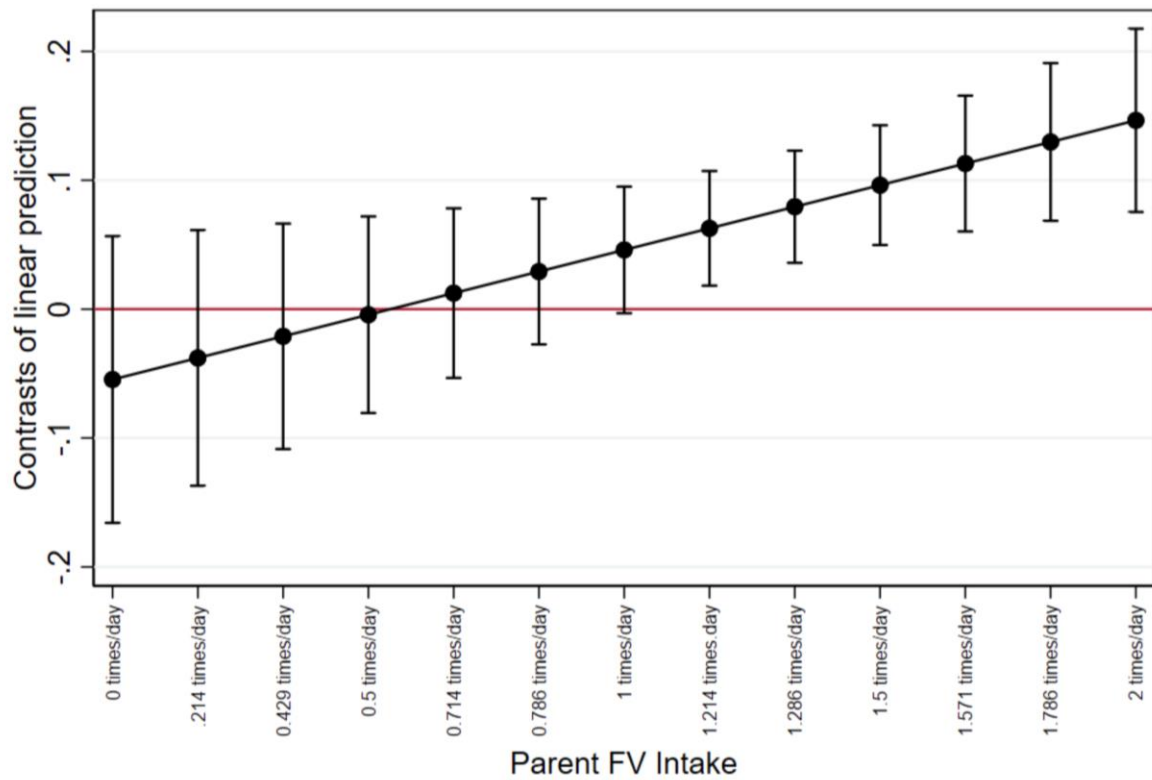

## **Text S1: Response Categories/Options of Variables**

### **Child FV intake**

During the past 7 days, how many times did your child:

1. Drink 100% pure fruit juice like orange, apple, grape, etc.?
2. Eat fruit per day?
3. Eat a green salad or non-friend vegetables like carrots, broccoli, collards, green beans, corn, etc.?
4. Eat fried potatoes like French fries, tater tots, hash brown potatoes, etc.?
5. Eat any other kind of potatoes for example, how many times did you eat potatoes that were baked, boiled, mashed, used in soups or stews, etc.?

Responses:

- Never
- 1-2 times per week
- 3-4 times per week
- 5-6 times per week
- 7 times per week

### **Parent FV intake**

During the past 7 days, how many times:

1. Did you eat fruits like apples, bananas, melons, etc.?
2. Did you eat vegetables like greens, carrots, peppers, tomatoes, squash, broccoli, cabbage, cauliflower, cucumbers, green beans, celery, sweet potatoes, etc.?

Responses:

- Never
- 1-2 times per week
- 3-4 times per week
- 5-6 times per week
- 7 times per week

### **Governmental Assistance Programs (Response Options: yes/no)**

Does your family use the following?

- Special Supplemental Nutrition Program for Women, Infants, and Children (WIC)
- Supplemental Nutrition Assistance Program (SNAP)
- Double Dollars Incentive Program
- Medicaid/Texas Health Steps
- Medicare
- National School Lunch and/or Breakfast Programs (NSLP)/ Free/Reduced meals at school
- Children's Health Insurance Program (CHIP)
